# Supplementary material for: A Versatile Method for Preparing Polysaccharide Conjugates via Thiol-Michael Addition
Source: MDPI journal article supplement (doi:10.3390/polym13121905), 2021-06-08
Supplement: s1 [file s1]

# Supplementary Materials: A versatile method for preparing polysaccharide conjugates via thiol Michael addition

Junyi Chen<sup>1\*</sup>, Xutao Ma<sup>1</sup> and Kevin J. Edgar<sup>2</sup>

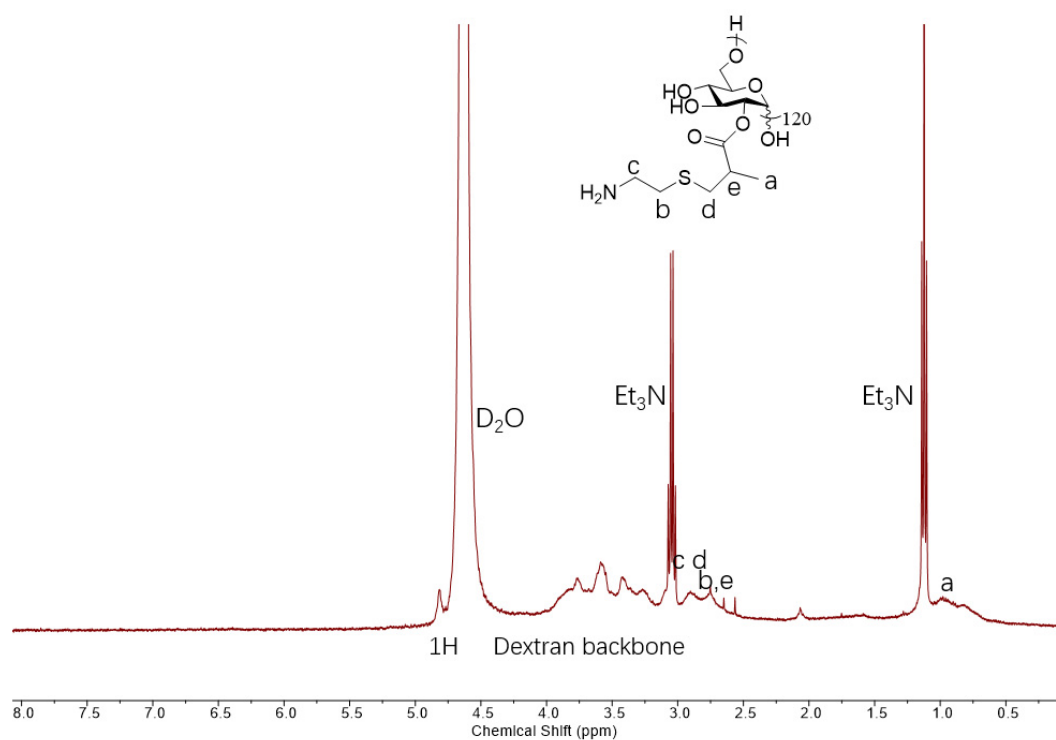

**Figure S1.** <sup>1</sup>H NMR spectrum of Dex-EA.

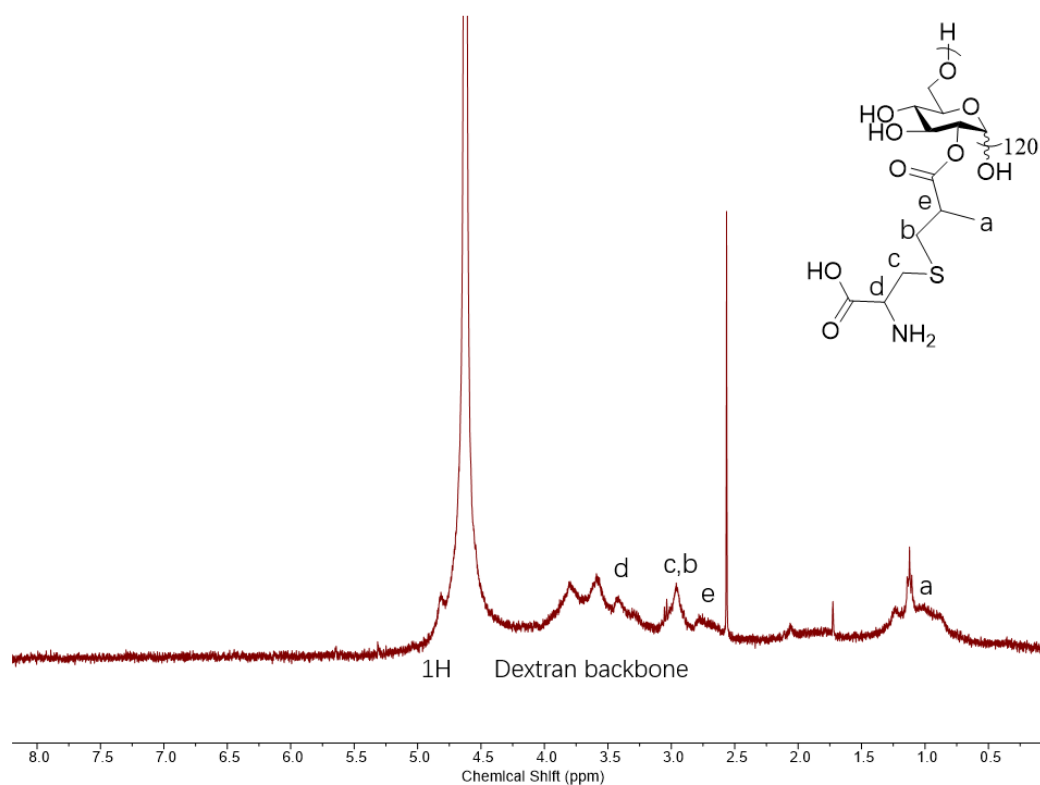Figure S2.  $^1\text{H}$  NMR spectrum of Dex-Cys.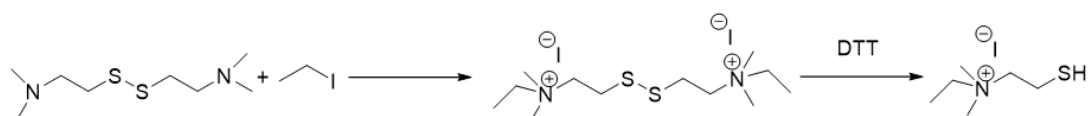

Scheme S1. Synthesis of N-Ethyl-2-thiol-N,N-dimethylethan-1-aminium iodide (QA-SH).

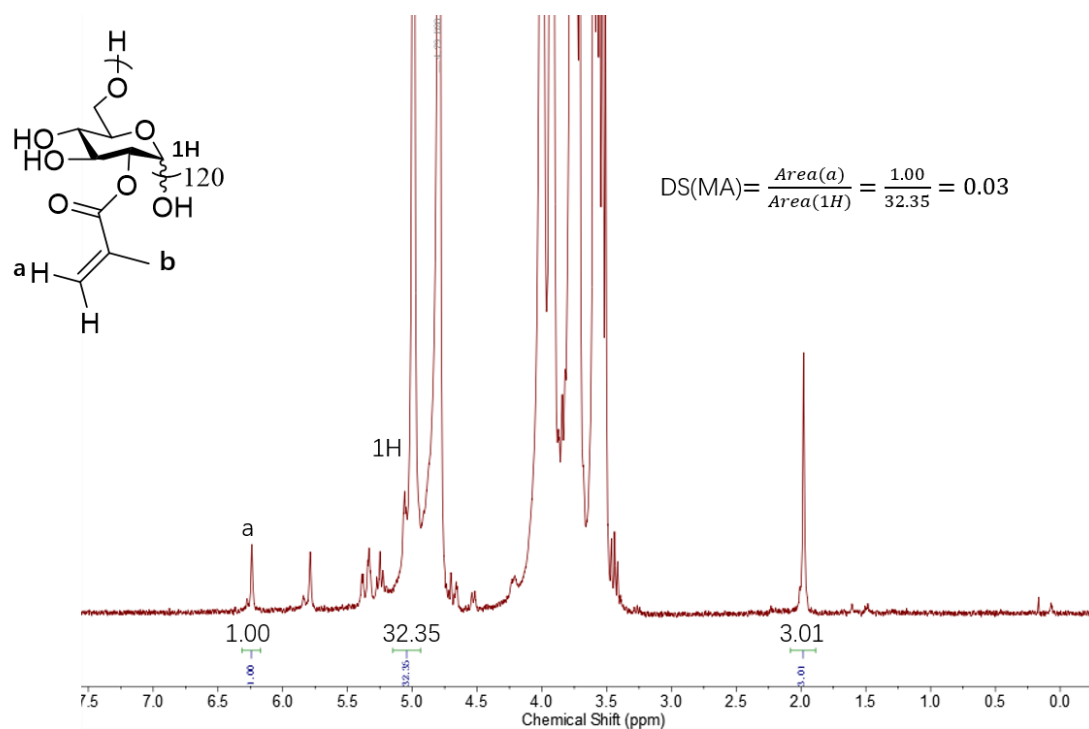

Figure S3. Calculation of the DS(MA) of Dex-MA.

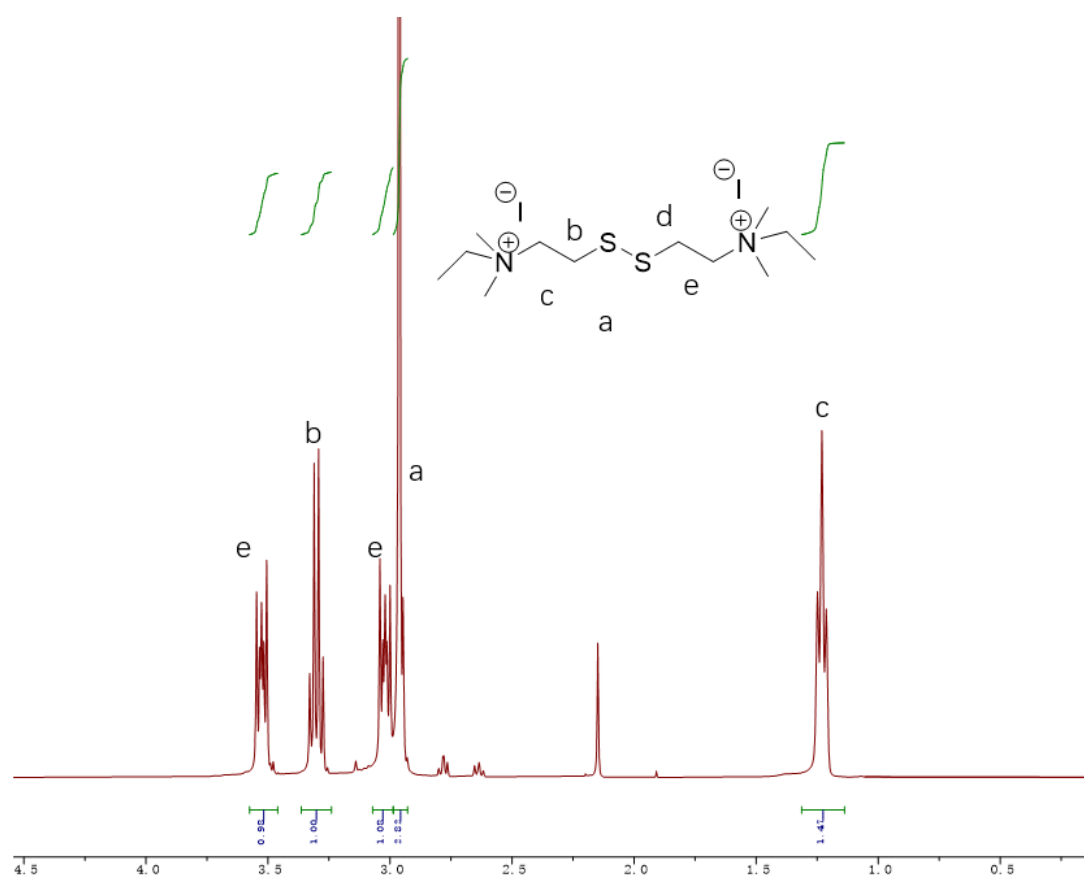

Figure S4.  $^1\text{H}$  NMR spectrum of QAS-SQA.

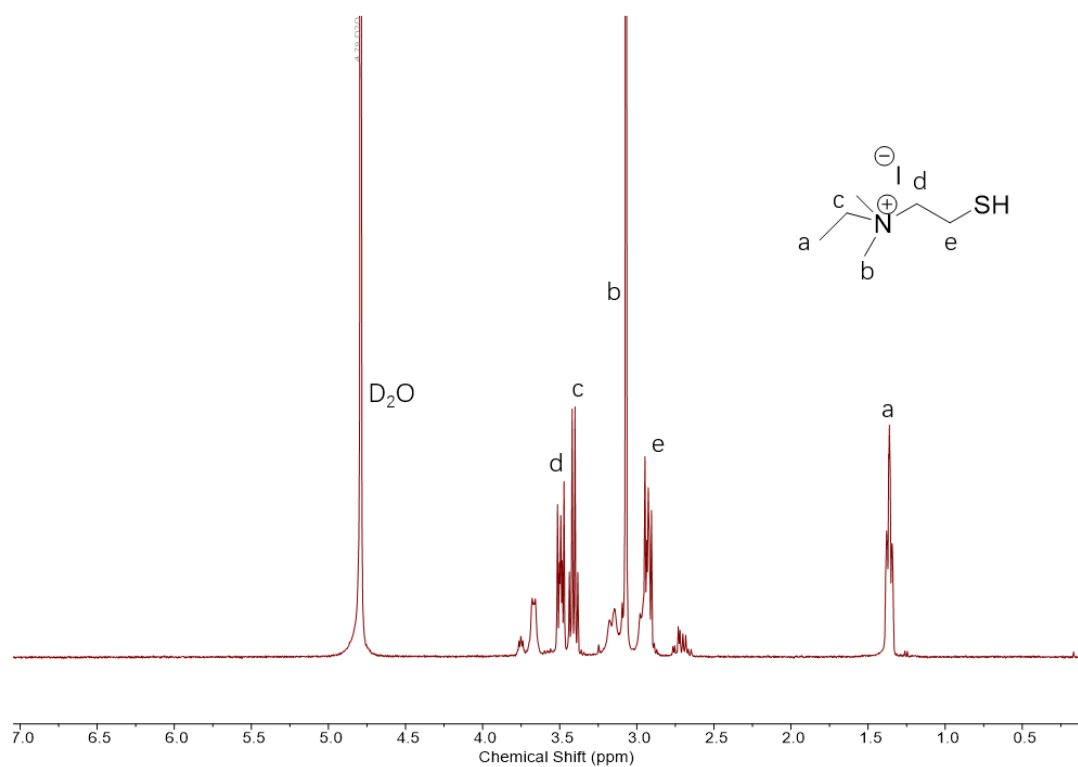

Figure S5.  $^1\text{H}$  NMR spectrum of QA-SH.
